# Supplementary material
Source: MDPI journal article supplement (https://www.mdpi.com/2076-3417/13/18/10007)
Supplement: s1 [file s1]

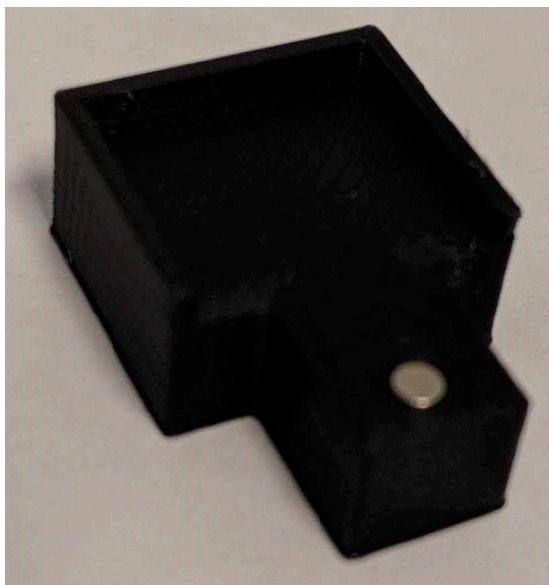

**Figure S1.** A custom 3D printed fixture used to position the SPCE directly above a 2mm Neodymium magnet to enable effective magnetic bead capture.

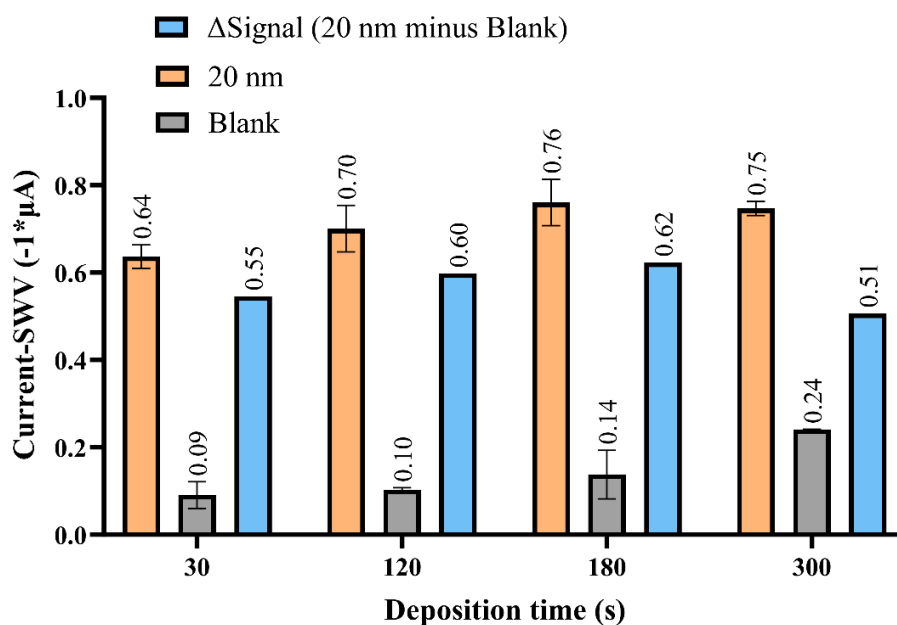

**Figure S2.** Absolute EC peak current (SWV) obtained for 20 nm AuNPs (at a concentration of  $1.4 \times 10^6$  AuNPs in 2  $\mu$ L DI water) at four different deposition times. Error bars represent standard deviation ( $n=3$ ). The blank (2  $\mu$ L DI water, no AuNPs) represents the control (measured at four different deposition times). 50  $\mu$ L of 0.1 M HCl is used as the supporting electrolyte. The mean values of peak current are labeled above the columns.

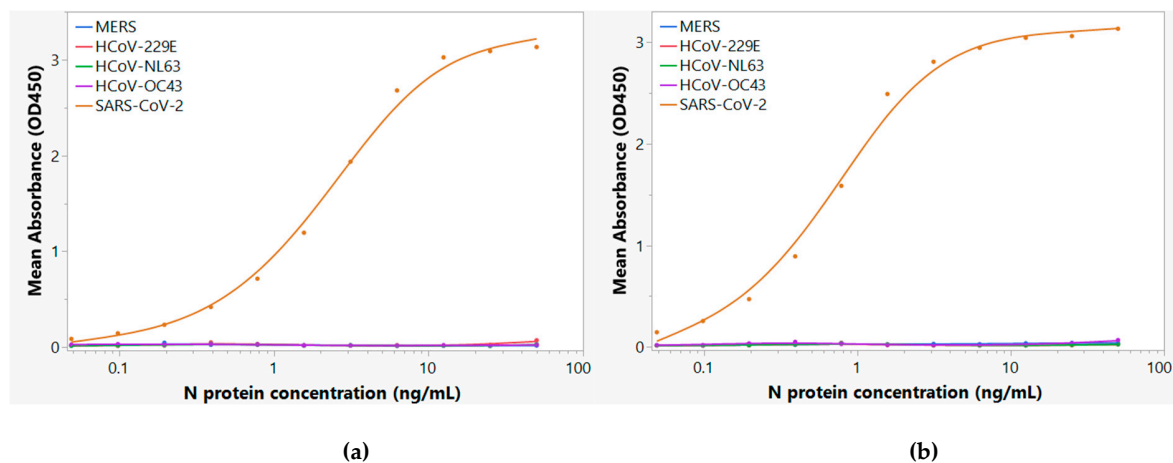

**Figure S3.** ELISA results evaluating the binding of (a) S46 and (b) S47 Anti-SARS-CoV-2 Nucleocapsid antibodies (#NUN-S46 & #NUN-S47 respectively) to various concentrations of different species of the Nucleocapsid protein (recreated from data provided by ACROBiosystems).

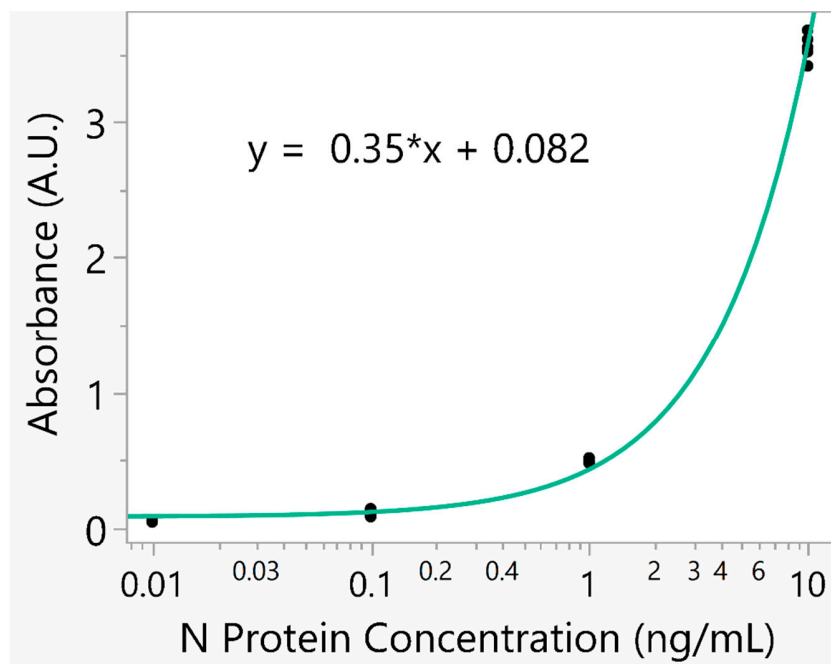

**Figure S4.** ELISA for validating the binding of S46 Anti-SARS-CoV-2 Nucleocapsid antibodies (#NUN-S46, ACROBiosystems) to varying concentrations of SARS-CoV-2 Nucleocapsid protein (#NUN-S47L8-200ug, ACROBiosystems), n=6.

Table S1

| Symbol | Meaning         |
|--------|-----------------|
| ns     | $P > 0.05$      |
| *      | $P \leq 0.05$   |
| **     | $P \leq 0.01$   |
| ***    | $P \leq 0.001$  |
| ****   | $P \leq 0.0001$ |

### Calculation for number of active antibodies per AuNP

As per ref.[1],

Number of active antibodies per particle (AuNP) =  $E_j \times E_a \times A_p/A_a$  ---- (Eqn.1)

$E_j$  (jamming limit) = 0.55

$E_a$  (proportion of active antibodies out of total antibodies conjugated to the AuNP)=1/3

$A_a$  (Area on the AuNP surface covered by an antibody) =  $\pi \frac{d^2}{4}$ , where diameter of the antibody (based on a 150 kDa M.W.)  $d = 9.08$  nm

$A_p$  = Surface area of AuNP =  $\pi D^2$ , where D is the AuNP diameter

For a 5 and 10 nm AuNP, ( $D = 5$  &  $10$  nm), based on Eqn.1, we obtain 0.88, and 0.22 active antibodies conjugated to each AuNP respectively.

### Calculation for number of spike protein trimers and monomers in a given volume at ag/mL concentration

Assuming a molecular mass of spike protein monomer is 132 kDa and trimer is 396 kDa[2].

Number of moles of spike trimer in 1 mL volume at 1 fg/mL concentration =  $\frac{1 \times 10^{-15}}{396000} = 2.52 \times 10^{-21}$  moles/mL.

Number of spike trimer molecules in 1 mL volume at 1 fg/mL concentration =  $2.52 \times 10^{-21} \times 6 \times 10^{23} = 1512$

Number of spike trimer molecules in 1 mL volume at 0.35 ag/mL (0.00035 fg/mL) concentration =  $0.00035 \times 1512 = 0.53$

Number of spike monomer molecules in 1 mL volume at 0.35 ag/mL concentration =  $0.53 \times 3 = 1.59 \approx 2$

As per ref.[3], a 50  $\mu$ L volume is placed on each working electrode of the SPCE.

Number of spike monomer molecules in 50  $\mu$ L volume at 0.35 ag/mL concentration =  $\frac{1.59 \times 50}{1000} = 0.08$

If we assume a 1:1 attachment of capture Ab-AuNP to spike monomer, this equates to <1 AuNP detected per SPCE.

### References

- [1] D. M. Patel, "Novel Sample Isolation and Nanomaterial-Based Electrochemical Detection of Bacterial Toxins for Food Security," Ph.D., The University of Utah, United States - Utah, 2023. Accessed: Apr. 18, 2023. [Online]. Available: <https://www.proquest.com/docview/2781661883/abstract/1B197B4D063D4A65PQ/1>
- [2] <https://www.prosci-inc.com/product/sars-cov-2-covid-19-trimeric-spike-s-recombinant-protein-10-075>
- [3] E. D. Nascimento et al., "COVID-19 diagnosis by SARS-CoV-2 Spike protein detection in saliva using an ultrasensitive magneto-assay based on disposable electrochemical sensor," Sens. Actuators B Chem., vol. 353, p. 131128, Feb. 2022, doi: 10.1016/j.snb.2021.131128
